# Supplementary material for: Adding exogenous biglycan or decorin improves tendon formation for equine peritenon and tendon proper cells in vitro
Source: Springer Nature journal article supplement (doi:10.1186/s12891-020-03650-2), 2020-09-23
Supplement: MOESM1 [file 18409450]

## **Adding Exogenous Biglycan or Decorin Improves Tendon Formation for Equine Peritenon and Tendon Proper Cells In Vitro**

Monica Y. Pechanec<sup>1</sup>, Tannah N. Boyd<sup>1</sup>, Keith Baar<sup>2,3</sup>, Michael J. Mienaltowski<sup>1</sup>

### Affiliations:

<sup>1</sup>Department of Animal Science, University of California Davis, 2251 Meyer Hall, One Shields Ave, Davis, CA 95616, USA.

<sup>2</sup>Department of Neurobiology, Physiology, and Behavior, University of California Davis, 195 Briggs Hall, One Shields Ave, Davis, CA 95616, USA.

<sup>3</sup>Department of Physiology and Membrane Biology, University of California Davis School of Medicine, 195 Briggs Hall, One Shields Ave, Davis, CA 95616, USA.

\*Corresponding author: [mjmienaltowski@ucdavis.edu](mailto:mjmienaltowski@ucdavis.edu)

## Supplementary Information

**Table S-1.** Equine Taqman primer probe sets designed using Primer3 or predesigned for RT-qPCR.

**Figure S-1.** Qualitative representation of TEM cross-sections at 5300x magnification.

**Figure S-2.** Biomechanics comparing tendon proper (TP) control against peritenon cells supplemented with bBGN and bDCN.

**Figure S-3.** Collagen content and collagen fraction by dry mass comparing TP control and peritenon treatment groups.

**Figure S-4.** RT-qPCR analysis for TP and peritenon treatment groups.

**Figure S-5.** Fibril diameter distribution analysis comparing tendon proper control against peritenon samples supplemented with 5 or 25 nM bBGN or bDCN.

**Figure S-6.** Collagen fibril quantity analysis between TP and peritenon treatment groups.

|               | Fwd                                                                          | Rev                         | Probe               |
|---------------|------------------------------------------------------------------------------|-----------------------------|---------------------|
| <i>POLR2A</i> | CCAGGATGACCTGACTCACAAA                                                       | CGTCGAAGCTGATTGTTGATCT      | TGGCGGACATTGTT      |
| <i>BGN</i>    | GGTGGGCGTCAACGACTT                                                           | GCCATTGTAGTAAGCCCGTTG       | CCCGTGGGTTTCG       |
| <i>DCN</i>    | TGCGAAAAGCGGTGTTCA                                                           | TGGGTTGGTGCCCACTTCTA        | ACTGAACCAGATGATAGTC |
| <i>MKX</i>    | TCATGTTCCGAAGATGGAGAAA                                                       | ATTGTAGCCCCCTTCGTTCA        | TCCTCCAAGAAACCAC    |
| <i>COL1A1</i> | GGGCCGAGGGCAACA                                                              | GTGGTTTTGTATTTCGATCACTGTCTT | CTTCACCTACAGCGTCAC  |
| <i>FMOD</i>   | AACCAAGGAGGCCAGACAGA                                                         | TGCATTTTGTCTCTCAAGTTGAA     | ACGTGGTCACTCTGAA    |
| <i>LOX</i>    | GCTTGCCAGCTCAGCAT                                                            | TCTTAGCAGCACCCCTGTGATCA     | CAGGTCAGATGTCAGAGAT |
| <i>CSPG4</i>  | CTCCTGGAGAGAGGTGGAACAG                                                       | TCAGTGTCTCGCTCCCATCA        | AGCTGATCCGCTATGTG   |
| <i>SCX</i>    | ThermoFisher, cat no 4351372,<br>Ec03818452_s1 -- Proprietary<br>information |                             |                     |

**Table S-1. Equine Taqman primer probe sets designed using Primer3 or predesigned for RT-qPCR.** Forward, reverse, and probe sequences for *POLR2A*, *BGN*, *DCN*, *MKX*, *COL1A1*, *FMOD*, *LOX*, *CSPG4*, and *SCX* for TaqMan specific RT-qPCR. Primer probe sets underwent dimerization, hairpin formation, melting temperature and GC content scrutiny. All primer probe sets were validated in native equine tendon proper and peritenon tissue.

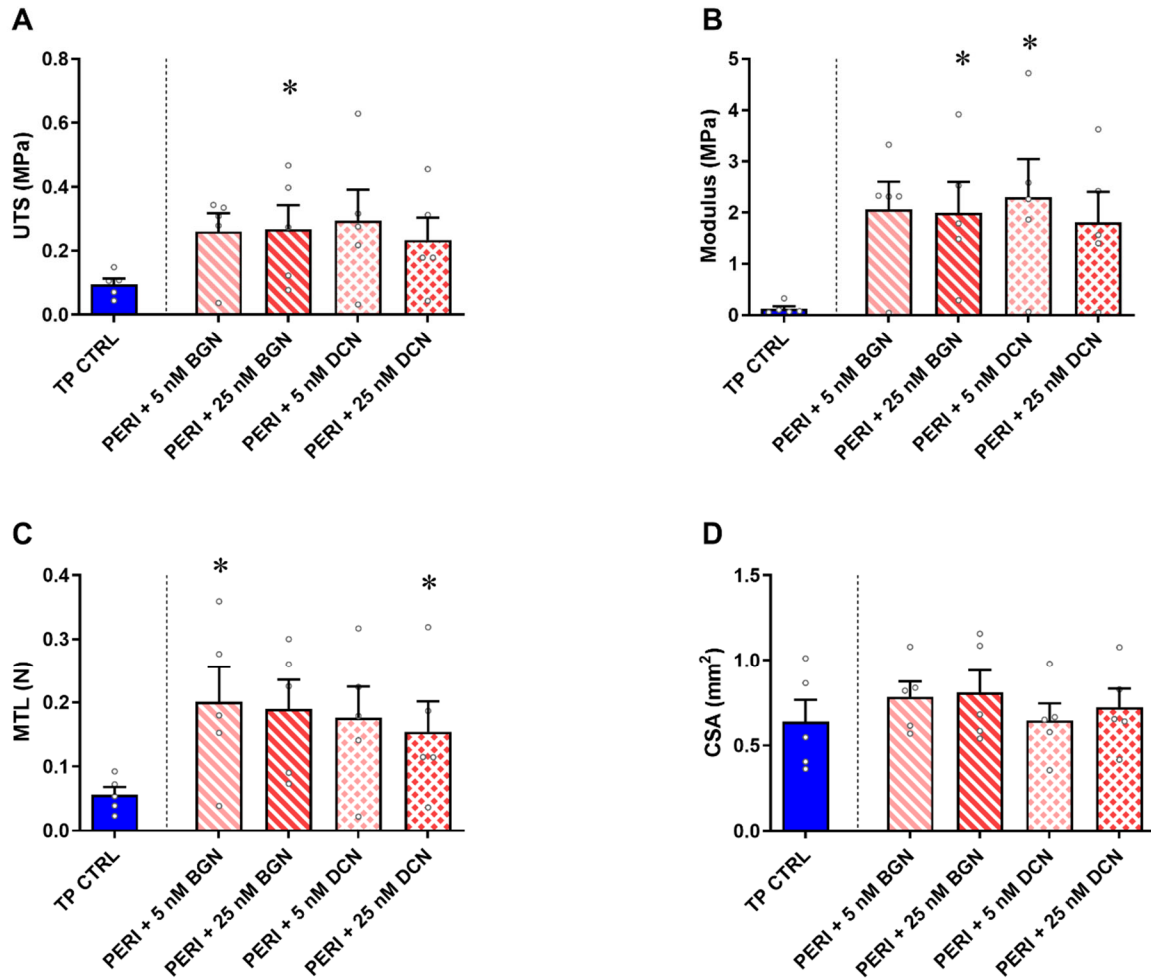

**Figure S-1. Biomechanics comparing tendon proper (TP) control against peritenon cells supplemented with bBGN and bDCN.** (A) Ultimate tensile strength, (B) Young's modulus, and (C) maximum tensile load for TP control cells were compared to peritenon treatment groups. TP: tendon proper cells; PERI: peritenon cells; CTRL: no bBGN or bDCN supplementation. Significance is based on one-sided nonparametric Wilcoxon signed-rank tests predicting improvement: \*, significant as  $p \leq 0.05$ , relative to the respective TP or PERI control;  $n = 5$ , plotted as mean + SEM. Measurements approaching significance ( $p=0.0625$ ) included: (A) 5 nM bBGN, 5 nM bDCN, and 25 nM bDCN; (B) 5 nM bBGN and 25 nM bDCN; (C) 25 nM bBGN and 5 nM bDCN. Outliers detected by the Grubbs' test in technical replicates (UTS, 2; Young's modulus, 2; MTL, 1;  $p < 0.05$ ) were removed.

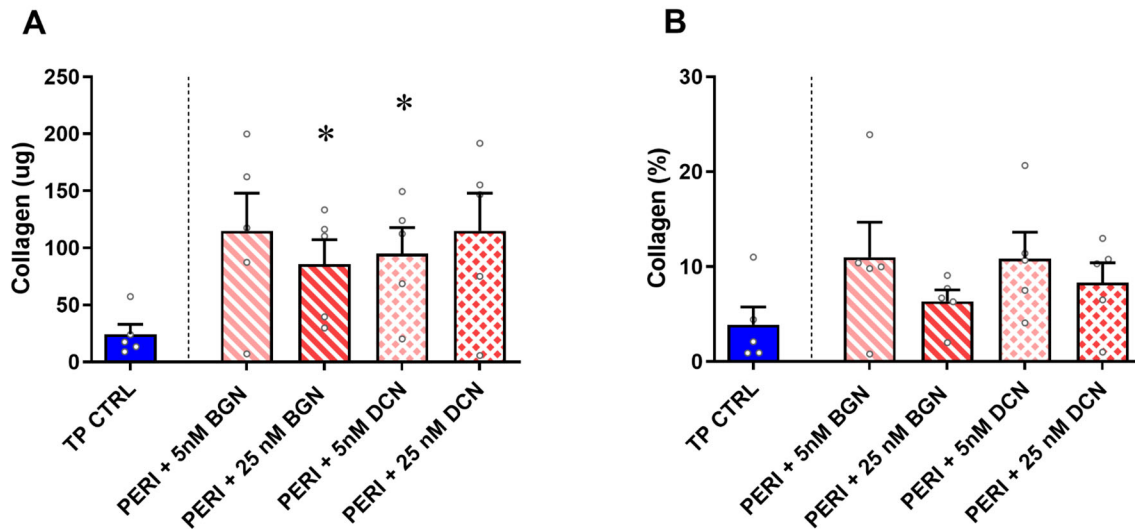

**Figure S-2. Collagen content and collagen fraction by dry mass comparing TP control and peritenon treatment groups.** Tendon proper (TP) cells were plotted against peritenon treatment groups for **(A)** collagen content and **(B)** collagen fraction by dry mass. TP: tendon proper cells; PERI: peritenon cells; CTRL: no bBGN or bDCN supplementation. Significance is based on one-sided nonparametric Wilcoxon signed-rank tests predicting improvement: \*, significant as  $p \leq 0.05$ , relative to the respective TP or PERI control;  $n = 5$ , plotted as mean + SEM. Measurements approaching significance ( $p=0.0625$ ) included: **(A)** 5 nM bBGN and 25 nM bDCN.

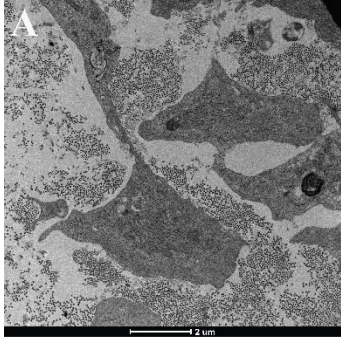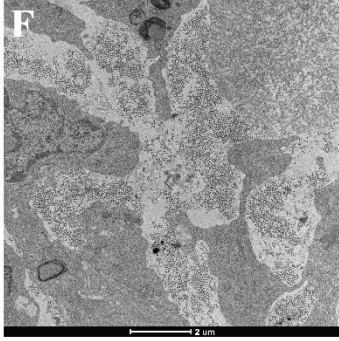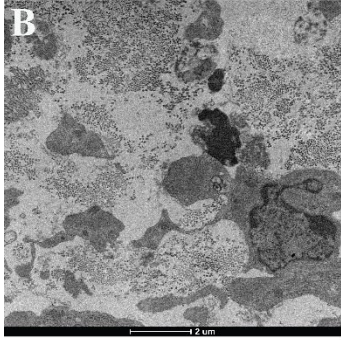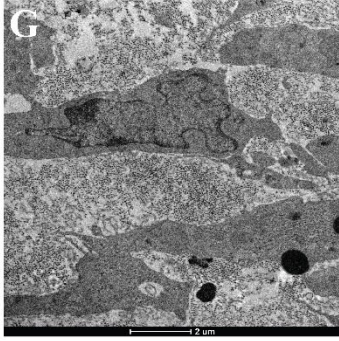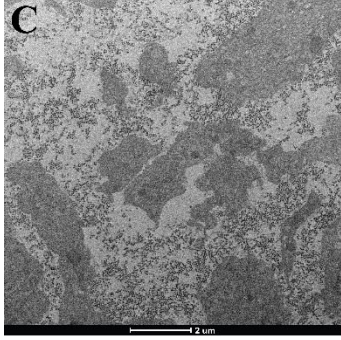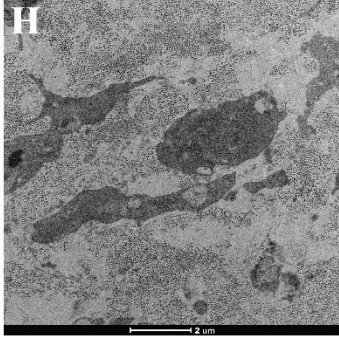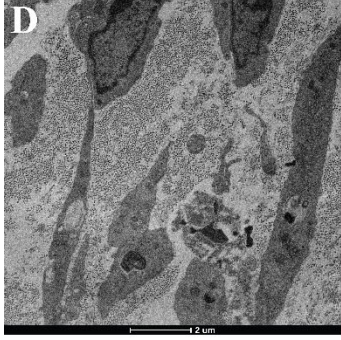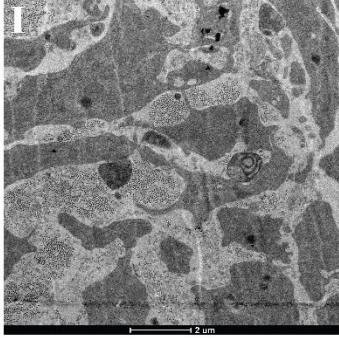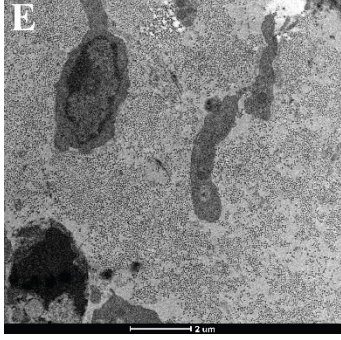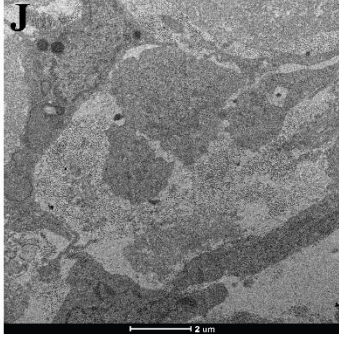

**Figure S-3. Qualitative representation of TEM cross-sections at 5300x magnification. (A) PERI CTRL, (B) PERI + 5 nM bBGN, (C) PERI + 25 nM bBGN, (D) PERI + 5 nM bDCN, (E) PERI + 25 nM bDCN, (F) TP CTRL, (G) TP + 5 nM bBGN, (H) TP + 25 nM bBGN, (I) TP + 5 nM bDCN, and (J) TP + 25 nM bDCN are represented with low magnification TEM images.**

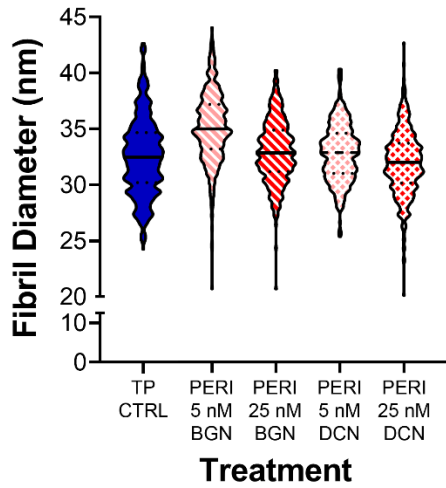

**Figure S-4. Fibril diameter distribution analysis comparing tendon proper control against peritenon samples supplemented with 5 or 25 nM bBGN or bDCN.** Fibril diameters were calculated and plotted as a violin plot for untreated TP constructs versus PERI +5 nM bBGN, PERI + 25 nM bBGN, PERI + 5 nM bDCN, and PERI + 25 nM, n = 5.

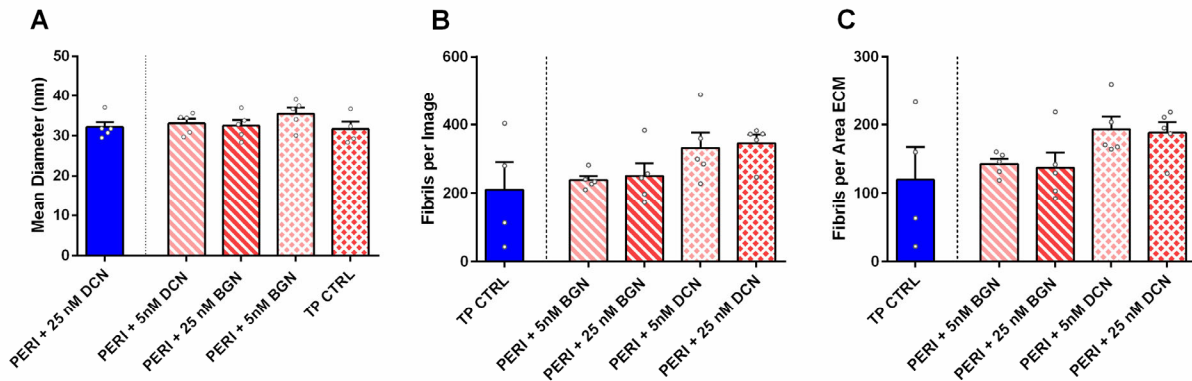

**Figure S-5. Collagen fibril quantity analysis between TP and peritenon treatment groups.** (A) Mean fibril diameter (nm), (B) fibril density, and (C) fibrils normalized per area of extracellular matrix were compared for TP control and peritenon samples treated with 5 or 25 nM bBGN or bDCN. TP: tendon proper cells; PERI: peritenon cells; CTRL: no bBGN or bDCN supplementation; ECM: extracellular matrix. Significance is based on one-sided nonparametric Wilcoxon signed-rank tests predicting improvement: \*, significant as  $p \leq 0.05$ , relative to the respective TP or PERI control;  $n = 5$ .



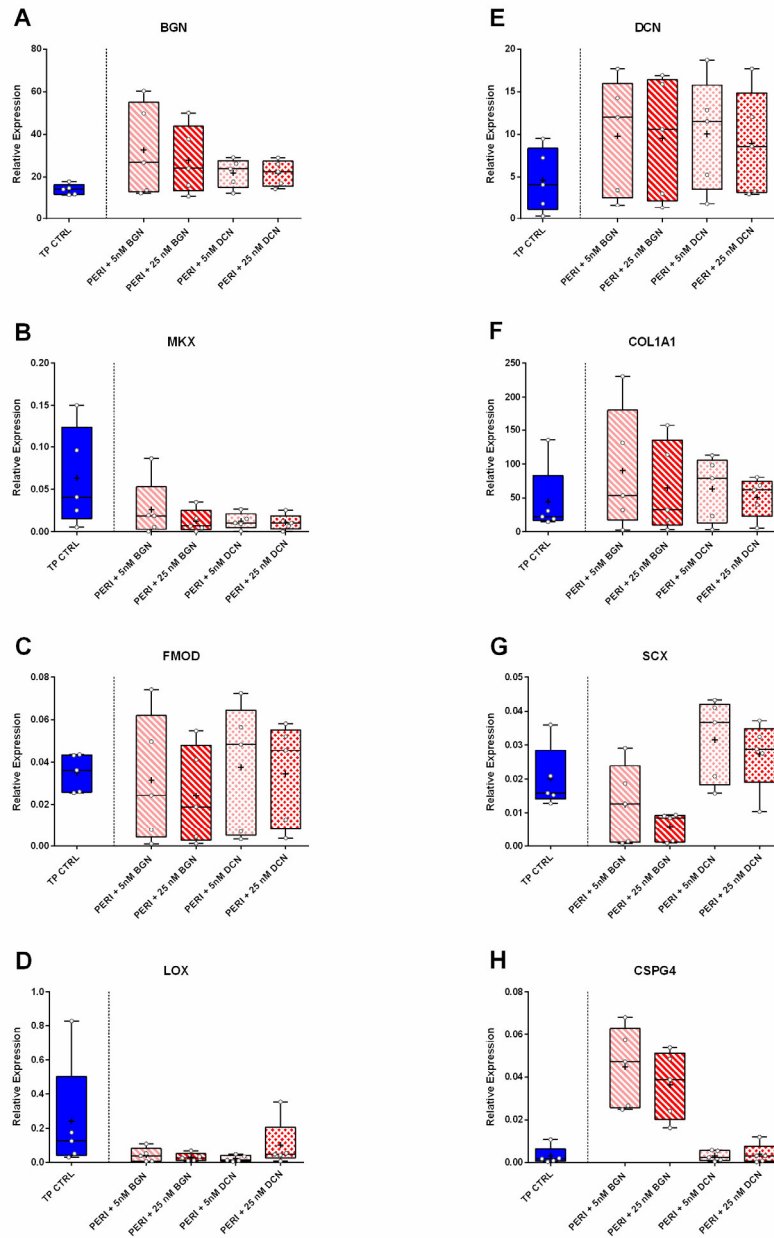

**Figure S-6. RT-qPCR analysis for TP and peritenon treatment groups.** Gene expression (*POLR2A* was used as the housekeeping gene) for TP control constructs were compared to peritenon constructs supplemented with 5 and 25 nM bBGN or bDCN. TP: tendon proper cells; PERI: peritenon cells; CTRL: no bBGN or bDCN supplementation. Expression is plotted in a box and whisker plot with “+” representing the mean, box representing first-third quartile, line representing median, and whisker representing range. Significance is based on one-sided nonparametric Wilcoxon signed-rank tests

predicting improvement: \*, significant as  $p \leq 0.05$ , relative to the respective TP or PERI control; n = 5.
